# Interferons drive development of novel interleukin-15-responsive macrophages in the uterus

## Authors and Affiliations:

Scott M. Gordon<sup>1</sup>, Mailyn A. Nishiguchi<sup>2</sup>, Sneha Mani<sup>3</sup>, Monica A. Mainigi<sup>3</sup>, and Edward M. Behrens<sup>2,4</sup>

<sup>1</sup>Division of Neonatology, Children's Hospital of Philadelphia, Philadelphia, PA 19104, USA,

<sup>2</sup>Perelman School of Medicine, University of Pennsylvania, Philadelphia, PA 19104, USA, <sup>3</sup>Center for Research on Reproduction and Women's Health, University of Pennsylvania, Philadelphia, PA 19104, USA, <sup>4</sup>Division of Rheumatology, Children's Hospital of Philadelphia, Philadelphia, PA 19104, USA

## Corresponding Author:

Edward M. Behrens

Room 1107A ARC

3615 Civic Center Blvd

Philadelphia, PA 19107

Office: 215-590-7180

Lab: 267-426-5278

Email: [behrens@email.chop.edu](mailto:behrens@email.chop.edu)

## Conflict of interest statement

The authors have declared that no conflict of interest exists.

## ABSTRACT

Disruption in homeostasis of interleukin-15 (IL-15) is linked to poor maternal and fetal outcomes during pregnancy. The only cells described to respond to IL-15 at the early maternal-fetal interface have been natural killer (NK) cells. We now show a novel population of uterine macrophages that expresses the  $\beta$  chain of the IL-15 receptor complex (CD122) and responds to IL-15. CD122+ macrophages (CD122+Macs) are morphologic, phenotypic, and transcriptomic macrophages that can derive from bone marrow monocytes. CD122+Macs develop exclusively in the uterus and placenta with kinetics that mirror interferon (IFN) activity at the maternal-fetal interface. Macrophage colony-stimulating factor (M-CSF) permits IFN to drive development of CD122+ macrophages. Neither Type-I nor Type-II IFNs are required to generate CD122+Macs *in vivo*, however. In response to IL-15, CD122+Macs activate the ERK signaling cascade and enhance production of proinflammatory cytokines after stimulation with the Toll-like receptor agonist CpG. Finally, we provide evidence of human cells that phenocopy murine CD122+Macs in secretory phase endometrium during the implantation window and in first-trimester uterine decidua. Our data support a model wherein IFNs local to the maternal-fetal interface direct novel IL-15-responsive macrophages with the potential to mediate IL-15 signals critical for optimal outcomes of pregnancy.

## INTRODUCTION

The notion of immune quiescence during pregnancy forms the basis for the decades-old central tenet of reproductive immunology (1). However, countless pieces of evidence now support that the action of proinflammatory cytokines are critical to a healthy gestation for both mother and fetus (2). As in many other contexts, though, the proinflammatory response must be regulated in order to avoid an adverse outcome of pregnancy caused by damage to the developing fetoplacental unit.

Perturbation in homeostasis of the pleiotropic cytokine interleukin-15 (IL-15) has been linked to poor maternal and fetal outcomes of pregnancy in mice and humans. Mice lacking IL-15 (*Il15<sup>-/-</sup>*) bear growth-restricted pups and exhibit higher rates of spontaneous resorptions than do IL-15-sufficient mice (3, 4). Mice deficient in either production of IL-15 or responsiveness to IL-15 exhibit abnormal utero-placental anatomy, including impaired remodeling of the uterine spiral arteries, a pathologic hallmark of life-threatening preeclampsia in humans (5). These data translate well to findings of reduced IL-15 in human placentae of pregnancies affected by preeclampsia (6). Conversely, IL-15 permits inflammatory-mediated fetal loss in mice (4). Indeed, spontaneous and recurrent miscarriage in humans is associated with unrestrained expression of IL-15 mRNA and protein (7).

IL-15 is abundant during normal pregnancy. In mice, IL-15 mRNA is expressed in the non-pregnant uterus, as well as in the utero-placental unit throughout pregnancy, with a peak at mid-gestation (8). In humans, IL-15 mRNA is found in low abundance in proliferative phase endometrium and increases substantially in secretory phase endometrium and first trimester decidua (9). IL-15 protein has been demonstrated in endometrial stromal cells, perivascular cells abutting uterine spiral arteries, and vascular endothelial cells, echoing the presumed roles for IL-15-responsive cells in vascular remodeling.

In the current model of IL-15 signaling, IL-15 is produced and complexed immediately with the high-affinity  $\alpha$  subunit of the IL-15 receptor (IL-15R $\alpha$ ) (10). The IL-15/IL-15R $\alpha$  complex is then presented on the surface of myeloid cells and non-hematopoietic cells. IL-15-responsive cells, typically killer lymphocytes bearing high levels of the  $\beta$  chain of the IL-15 receptor complex (CD122) and the common  $\gamma$  chain ( $\gamma_c$ ), then directly contact the cells presenting IL-15/IL-15R $\alpha$ . Consistent with this notion that monocytes and macrophages produce and present IL-15 for use by IL-15-responsive lymphocytes, IL-15 is bound to the cell surface of CD14 $^{+}$  monocytes and macrophages in single cell suspensions of human first-trimester uterine decidua (9), the uterine lining remodeled to accept an embryo. Consistent with these data in humans, pregnant mice lacking  $\gamma_c$  but reconstituted with bone marrow from *IL15 $^{-/-}$*  mice exhibit normal uterine vascular remodeling. These findings support that the dominant sources of IL-15 in mice also are non-hematopoietic cells and chemo-resistant myeloid cells (11).

Altogether, these data show that appropriate signaling by IL-15 is critically important to healthy pregnancy. However, the targets and mechanisms of IL-15 signaling at the maternal-fetal interface are incompletely understood. NK cells are the prototypical IL-15-responsive cell type at the maternal-fetal interface. They are highly prevalent in the uterus and produce proinflammatory interferon  $\gamma$ , without which uterine arteries do not remodel and preeclampsia develops (12). Because uterine and other NK cells clearly depend on IL-15 for development (13, 14), it has been presumed that NK cells are responsible for all abnormalities of pregnancy associated with disrupted homeostasis of IL-15. Calling this presumption into question, though, mice that develop spontaneous preeclampsia with abnormal placentae and high rates of fetal loss exhibit increased expression of IL-15 but substantially reduced numbers of NK cells (15, 16).

We now report that novel macrophages, termed CD122+Macs, express high levels of CD122 in the uterus of mice and humans. Macrophage colony-stimulating factor (M-CSF) permits Type-I and -II interferons to drive expression of CD122 on these macrophages. CD122+Macs respond to IL-15 by activating the ERK signaling cascade, and CD122+Macs stimulated with the Toll-like receptor agonist CpG enhance production of cytokines in response to IL-15. CD122+Macs represent a new and unexpected target of IL-15 in the utero-placental unit and, thus, are likely to have significant clinical implications in healthy and complicated pregnancies.

## RESULTS

### *CD122+ macrophages are unique to the uterus in mice*

To determine whether uterine leukocytes other than NK cells could be cellular targets of IL-15, we comprehensively examined expression of CD122 on immune cells in pregnant female mice. In contrast to immune cells found in other lymphoid and non-lymphoid organs, a population of cells co-expressing high levels of CD122 and the macrophage-associated glycoprotein F4/80 were evident in the uterus of pregnant mice (Figure 1A, Supplemental Figure 1A). During early gestation, these CD122+F4/80<sup>bright</sup> cells were present in the myometrium but most enriched in the uterine decidua.

Rarely are classical myeloid and lymphoid proteins co-expressed in the same cell. Recently, NK cells expressing canonical myeloid transcripts, including *Csf1r*, were identified in obese mice and humans (17). Thus, it was possible that CD122+F4/80<sup>bright</sup> cells represented a subpopulation of so-called myeloid NK cells, given the high abundance of NK cells in the early gestation uterus. In order to determine to which lineage uterine CD122+F4/80<sup>bright</sup> cells belonged, we compared their morphology to other uterine cell types. Murine uterine CD122+F4/80<sup>bright</sup> cells were morphologically large and hyper-vacuolated, similar to conventional CD122-F4/80<sup>bright</sup> macrophages (Figure 1B, Supplemental Figure 1B). CD122+F4/80<sup>bright</sup> and CD122-F4/80<sup>bright</sup> cells were CD11c<sup>int</sup>, Ly6C<sup>lo/neg</sup>, and CCR2<sup>hi</sup>, a cell surface phenotype typically associated with macrophages (Figure 1C). CD122+F4/80<sup>bright</sup> and CD122-F4/80<sup>bright</sup> cells could be distinguished by expression of MHC Class II (MHCII), with CD122+F4/80<sup>bright</sup> cells largely MHCII<sup>lo</sup> and CD122-F4/80<sup>bright</sup> cells largely MHCII<sup>hi</sup>. In contrast, F4/80<sup>int</sup> cells appeared smaller, less granular, morphologically monocytic, and Ly6C<sup>hi</sup> (Figure 1, B and C, Supplemental Figure 1B).

The morphology and flow cytometric profile of CD122+F4/80<sup>-</sup> cells were consistent with classical large, granular, decidual NK cells (Figure 1, B and C, Supplemental Figure 1B). Nearly all

decidual NK cells express NKp46 and the tissue-resident NK cell marker CD49a, especially early in gestation (18). We found that decidual NKp46+CD49a+ cells did not co-express F4/80 (Supplemental Figure 1C). Conversely, CD122+F4/80<sup>bright</sup> cells expressed neither CD49a nor CD49b/DX5. Also, CD122+F4/80<sup>bright</sup> cells expressed neither T-bet nor Eomesodermin (Supplemental Figure 1D), closely-related master regulators of innate lymphoid fate that are abundantly expressed in uterine innate lymphoid cells (18-20). Further, neither Ly6G+ neutrophils nor conventional CD11c<sup>bright</sup>MHCII<sup>bright</sup> dendritic cells (DCs) contributed meaningfully to the pool of CD122+F4/80<sup>bright</sup> cells (Supplemental Figure 1E). Morphologic and phenotypic data thus supported the notion that CD122+F4/80<sup>bright</sup> cells were macrophages and not NK cells, DCs, or neutrophils.

We next tested whether CD122+F4/80<sup>bright</sup> cells were most like macrophages or another cell type at the level of the transcriptome. A monocyte-macrophage-specific reporter system, known as the MM-DTR mouse, fluorescently labels with mCherry monocytes and macrophages that transcribe both *Lyz2* (LysM) and *Csf1r* (macrophage colony-stimulating factor receptor, M-CSFR) (21). Expression of CD122 directly correlated with expression of mCherry in F4/80<sup>bright</sup> cells in the uterus (Figure 1D), suggesting that these cells were of the monocyte/macrophage lineage.

We then sort-purified decidual CD122+F4/80<sup>bright</sup> cells (CD122+ macrophages, or CD122+Macs), CD122-F4/80<sup>bright</sup> (conventional, CD122- macrophages, or cMacs), and CD122+F4/80- cells (NK cells) to a purity of at least 95% (Supplemental Figure 2A) and analyzed the transcriptome using RNA microarrays. We found that 86.5% of the variance in gene expression among these populations could be attributed to the first principal component, PC1 (Figure 1E). Clustering samples along PC1 clearly separated cMacs and CD122+Macs from NK cells. Similarly, hierarchical clustering analysis showed that all macrophages were closely related to each other but distantly related to NK cells (Figure 1F). Among genes enriched in CD122+Macs relative to

NK cells were those typically associated with macrophages, including *C3ar1* (22), *Cd68*, *Csf1r*, *Fcgr1*, *Lyz2*, and a battery of Toll-like receptors (Supplemental Figure 2B). Among genes enriched in NK cells relative to CD122+Macs were those typically associated with NK cells, including the cytolytic mediator *Prf1* (Perforin), many granzymes, several Ly49 receptors, and *Eomes* and *Tbx21* (T-bet) (Supplemental Figure 2C). Of note, some cytolytic genes, including *Prf1* and several granzymes, were modestly but significantly enriched in CD122+Macs relative to cMacs (Supplemental Figure 2D). Altogether, these data support the notion that CD122+Macs and cMacs are highly related but distinct subtypes of uterine macrophages.

#### *CD122+Macs are present in human endometrium and decidua*

Given the unusual phenotype and restricted anatomic location of CD122+Macs in mice, we assessed whether such macrophages were also found in the human uterus. A recent report profiled the immune composition of the early maternal-fetal interface using single-cell RNA sequencing (23). Not surprisingly, and consistent with our murine transcriptomic data, myeloid cells (including macrophages) clustered with other myeloid cells, and innate lymphocytes (including NK cells) clustered with other innate lymphocytes. However, the focus of the investigation was not strictly on macrophages, rather the entire hematopoietic and non-hematopoietic composition of the maternal-fetal interface. Thus, it was not possible to glean from those data whether the correlate of murine CD122+Macs existed in the cycling uterus or in the first trimester human decidua.

We therefore examined human secretory endometrium during the implantation window, as well as first-trimester decidua, for the presence of CD122+Macs. We relied on high expression of CD14 to identify classical monocytes and macrophages (Supplemental Figure 3A). We first confirmed high abundance of CD56<sup>bright</sup>CD16<sup>dim</sup> uterine NK cells (24) in these samples, which contrasted with predominantly CD56<sup>dim</sup>CD16<sup>bright</sup> NK cells in the blood (Figure 2, A and B,



Supplemental Figure 3, A-E, Supplemental Figure 4, A-C). NK cells were also uniformly CD122+. As in the mouse, human decidual NK cells were morphologically large and finely granular, as opposed to the large and hyper-vacuolated appearance of human cMacs (not shown). Human CD122+Macs varied widely in abundance among individual samples but were present in all first-trimester deciduae tested. CD122+Macs were also present in over half of human secretory phase endometrial biopsies examined during the implantation window (Figure 2B, Supplemental Figure 4, A-C). Human CD122+Macs variably expressed CD56 (Figure 2, A and B, Supplemental Figure 3, A-E, Supplemental Figure 4, A-I). CD56 is typically associated with cytotoxicity, but it has been found on myeloid cells in certain contexts (25). Consistent with this literature, human CD122+Macs expressing higher levels of CD56 appeared to express the cytolytic molecules Perforin and Granzyme B, similar to what was found at the transcriptional level in mouse CD122+Macs. Conversely, human CD122+Macs expressing low levels of CD56 expressed few cytolytic molecules, similar to levels seen in conventional decidual macrophages. Overall, human CD122+Macs bore striking resemblance to murine CD122+Macs, supporting the use of our murine model to obtain mechanistic insights into the biology of this novel uterine macrophage in humans.

#### *Mouse CD122+Macs can derive from monocytes*

Our morphologic, phenotypic, and transcriptomic data supported that CD122+Macs were macrophages. Myriad embryonic and adult progenitors give rise to macrophages in different tissues (26, 27). Monocytes are recruited in large numbers to the gravid uterus during gestation (28). We thus tested the hypothesis that CD122+Macs could derive from adult bone marrow monocytes. Magnetic bead-purified Ly6C<sup>hi</sup> monocytes from adult mouse bone marrow of MM-DTR mice were adoptively transferred into pregnant recipients during the peri-implantation period (Figure 3, A and B). Recipients were then sacrificed at mid-gestation. We observed tissue-specific differences in phenotype of recovered donor cells with respect to both F4/80 and CD122.

Donor cells recovered from recipient blood, spleen, and bone marrow were almost uniformly F4/80<sup>int</sup> (Figure 3B), suggesting maintenance of monocyte fate. In contrast, donor cells recovered from recipient peritoneum, myometrium, and decidua contained F4/80<sup>bright</sup> cells, suggesting some conversion to tissue macrophages in these organs.

Despite conversion of monocytes to F4/80<sup>bright</sup> cells in the peritoneum, we found that transferred monocytes converted to F4/80<sup>bright</sup> CD122+Macs only in the myometrium and decidua (Figure 3B). These data are consistent with our findings that CD122+Macs are found exclusively in the uterus. Of note, we performed this experiment with both pregnant and non-pregnant donors with identical results (data not shown), suggesting no intrinsic differences in potential of bone marrow monocytes between pregnant and non-pregnant mice. Altogether, our data support a model in which bone marrow monocytes are recruited to the uterus, where they are uniquely permitted to differentiate into CD122+Macs.

#### *Tissue-specific population dynamics of CD122+Macs during gestation*

Populations of myeloid cells, including dendritic cells, monocytes, and macrophages, are in constant flux at the maternal-fetal interface during gestation (28, 29). We thus investigated population dynamics of uterine CD122+Macs before and during pregnancy in the mouse. The myometrium exhibited progressive percent enrichment of F4/80<sup>bright</sup> cells over the course of gestation (Figure 4, A and B), which agrees with and extends prior findings (28). This was in contrast to progressive declines in NK cells after mid-gestation (Figure 4, A-C), consistent with prior reports (30). On a percentage basis, myometrial CD122+Macs were more apparent over the course of gestation until E16.5 (Figure 4, A and B). By E12.5 and before E16.5, myometrial CD122+Macs also exhibited more robust expression of CD122 on a per-cell basis, eventually surpassing that of NK cells. The absolute number of CD122+Macs per gram of myometrial tissue remained relatively stable through mid-gestation but declined thereafter (Figure 4C).

Similar to the myometrium, the combined decidual and placental layers exhibited progressive decline in NK cells but progressive relative enrichment of CD122+Macs during pregnancy (Figure 4, A and B). Unlike the myometrium, however, this relative enrichment of CD122+Macs in the decidua and placenta appeared to be at the expense of F4/80<sup>bright</sup> cMacs in those tissue layers. Also unlike the myometrium, a robust proportion and absolute number of CD122+Macs persisted as gestation approached term (Figure 4, B and C). In the early post-implantation period through E10.5, CD122+Macs expressed moderate amounts of CD122 in the decidua and placenta (Figure 4, A and B). From E11.5 through E18.5, the last timepoint we examined before delivery, deciduo-placental CD122+Macs experienced a dramatic upregulation of CD122 on a per-cell basis beyond that observed in the myometrium.

In the non-pregnant uterus, we observed a population of CD122+F4/80<sup>int</sup> cells that became less apparent during pregnancy (Figure 4A). Prior reports suggested that this same F4/80<sup>int</sup> population in the nonpregnant uterus contained a large number of eosinophils. Our data confirmed that presumptive eosinophils, with high side scatter properties and low to no expression of CD64, are abundant within the bulk F4/80<sup>int</sup> population (Supplemental Figure 5). However, these cells were uniformly negative for CD122. F4/80<sup>int</sup>CD122+ cells, on the other hand, exhibited relatively low side scatter properties and were CD64+, consistent with monocytes. These data reinforce a model in which monocytes and macrophages are the only uterine myeloid cells that express CD122. Further, these data provide evidence for a model in which populations of CD122+Macs and CD122+ monocytes are dynamically regulated in a tissue layer-specific fashion in the pre-pregnant and gravid uterus.

*Type-I and II interferons are sufficient for development of CD122+Macs*

Our data suggested that the uterus provided a unique niche in which CD122+Macs were fostered. Further, the drivers of the CD122+Mac fate appeared transiently strongest just after mid-gestation in the myometrium and persistently strong from mid-gestation through near-term in the deciduo-placental unit. Total interferon (IFN) activity at the mouse maternal-fetal interface precisely mirrors the population dynamics of CD122+Macs (31). The non-pregnant uterus transcribes Type-I IFN and IFN-stimulated genes (ISGs) (32), and Type-II IFN is apparent during the estrous phase (33). In the pregnant myometrium, total IFN activity is low until E10, peaks between E11 and E15, then returns to low levels after E15 (31). IFN activity is already robust in the developing placenta at E10 but spikes dramatically after E10 through to term.

To test whether IFNs played a role in development of uterine CD122+Macs, we compared the transcriptomes of decidual cMacs and CD122+Macs during early gestation, when both cell types were present and in similar abundance. Gene ontology (GO) analysis of transcripts significantly upregulated in CD122+Macs relative to cMacs showed strong enrichment of genes associated with interferon signaling and antiviral responses (Figure 5, A and B). With this information, we next sought to determine whether IFNs were sufficient to drive expression of CD122 on decidual macrophages. F4/80+ cells in bulk single-cell suspensions of early gestation decidual capsules exhibited a dose-dependent upregulation of CD122 upon exposure to recombinant IFN $\alpha$ , though this effect was strongest in F4/80<sup>int</sup> cells (Figure 5, C and D, data not shown). To extend these findings, we cultured sort-purified uterine F4/80<sup>int</sup> monocytes in macrophage colony-stimulating factor (M-CSF) with or without Type-I IFN $\alpha$ . Consistent with the notion that culture in macrophage colony-stimulating factor (M-CSF) results in endogenous production of Type-I IFN by macrophages (34), we did observe some expression of CD122 on uterine monocytes cultured in M-CSF alone (Figure 5, C and D). However, addition of IFN $\alpha$  resulted in robust upregulation of CD122+ compared to culture in M-CSF alone.

Further, we could derive CD122+Macs *in vitro* from nonadherent bone marrow cells. Bone marrow-derived macrophages (BMDMs) upregulated CD122 in a dose-dependent fashion in response to both Type-I IFN $\alpha$  and Type-II IFN $\gamma$  (Figure 5, E and F). While the ability to drive expression of CD122 on BMDMs was shared by both Type-I and II IFNs, we did observe differential effects of Type-I and -II IFNs on expression of MHCII (Supplemental Figure 6), in agreement with prior reports (35). Consistent with endogenous production of Type-I IFN by M-CSF-stimulated macrophages (34), blockade of the Type-I IFN receptor (IFNAR) abolished modest expression of CD122 by BMDMs cultured in M-CSF alone (Figure 5, E and F). Blockade of the IFN $\gamma$  receptor (IFNGR), however, had no effect on level of CD122 in BMDMs cultured in M-CSF alone, suggesting that BMDMs do not produce endogenous IFN $\gamma$ .

To determine whether expression of CD122 by BMDMs in response to IFNs was a phenomenon universal to all macrophages, we generated “GM-BMDMs” by culturing nonadherent bone marrow in medium supplemented with high-dose granulocyte-macrophage colony-stimulating factor (GM-CSF), instead of M-CSF (36, 37). Consistent with prior reports (36), GM-BMDMs upregulated CD11c and MHCII to a greater extent than traditional BMDMs (Figure 5G). Also in contrast to traditional BMDMs, GM-BMDMs produce less endogenous Type-I IFN (37). Indeed, we observed that GM-BMDMs expressed little CD122 relative to traditional BMDMs (Supplemental Figure 4B). While traditional BMDMs upregulated CD122 robustly in response to Type-I IFN, GM-BMDMs did not change expression of CD122 in response to exogenous Type-I IFN. Taken together, these data support a model in which M-CSF primes monocytes to develop into macrophages capable of expressing CD122 in response to IFNs.

*Type-I and II interferons are not required for development of CD122+Macs in vivo*

We next assessed whether responsivity to Type-I and/or II IFNs was required for development of CD122+Macs during pregnancy. As CD122+Macs could derive from monocytes, we chose to determine requirements for Type-I and II IFNs in generation of CD122+Macs with adoptive transfer of BM monocytes. While recovery of adoptively transferred cells from mice not treated with radiation or chemotherapy is low, this approach allows for testing of cell-intrinsic requirements for Type-I and -II IFNs in development of uterine CD122+Macs in normal pregnancy. As discussed above, both Type-I and -II IFNs are produced at the maternal-fetal interface (31-33). Recently, Type-III IFN $\lambda$  was shown to play a critical role in fetal protection against infection with Zika virus in mice and humans (38, 39). Thus, all three known families of IFN are actively produced at the maternal-fetal interface. Combined with our data that either Type-I or -II IFN is sufficient to induce expression of CD122 on BMDMs in vitro, we hypothesized that there would be no specific IFN required for development of CD122+Macs. In other words, any class of IFN might be able to signal to uterine macrophages to differentiate into CD122+Macs. Consistent with this hypothesis, donor-derived CD122+Macs were equally evident after transfer of BM monocytes from wild-type, IFNAR-deficient (IFNAR KO), IFNGR-deficient (IFNGR KO), and doubly IFNAR/IFNGR-deficient (DKO) mice (Figure 6, A and B). In other words, receptivity to Type-I and -II IFNs, alone or in combination, is not required for BM monocytes to reach the uterus and develop into CD122+Macs during late gestation pregnancy, when total IFN activity is high.

#### *IL-15 signals through CD122 to enhance function of CD122+Macs*

Despite the observed expression of CD122 by CD122+Macs, if and how IL-15 signals to macrophages remained unknown. IL-15 has been shown to signal through CD122 and the common gamma chain ( $\gamma_c$ ), which results in phosphorylation of numerous downstream targets, including ERK (40). To test for phosphorylation of ERK in CD122+Macs exposed to IL-15, we first treated BMDMs with IFN $\alpha$  to express CD122 (Figure 5E). Cytokines already present in

culture, including exogenous IFN $\alpha$ , were then removed by washing adherent cells thoroughly and adding fresh, cytokine-free medium. Washed CD122+BMDMs were then stimulated in the presence or absence of IL-15 pre-complexed to the  $\alpha$  chain of the IL-15 receptor (IL-15R $\alpha$ ), which most closely approximates true presentation of IL-15 *in vivo* and optimizes its activity (41). BMDMs stimulated with IFN express IL-15R $\alpha$  (42), which can transduce IL-15 signals in the absence of CD122 in certain cell types (43). Use of a pre-associated IL-15/IL-15R $\alpha$  complex, rather than free IL-15, ensured that any effects seen by stimulating CD122+BMDMs with IL-15 would be mediated through CD122/ $\gamma_c$  and not IL-15R $\alpha$ . After 30 minutes of stimulation, we observed robust phosphorylation of ERK1/2 in cells treated with the IL-15 complex (Figure 7, A and B). These data support that IL-15 signals through CD122 in macrophages using the ERK/MAPK cascade, similar to other IL-15-responsive cell types. Whether distinct IL-15 signaling cascades exist in macrophages remains to be determined.

IL-15-deficient mice do not remodel uterine spiral arteries properly, which is a pathologic hallmark of human preeclampsia and has been attributed to impaired production of IFN $\gamma$  by NK cells (14). Indeed, other strains exhibiting this particular defect include mice deficient in IFN $\gamma$ /IFNGR (12) and IL-12 and/or IL-18 (44). NK cells are well-known to depend on IL-15 for survival and function (45, 46). Macrophages can produce IL-12, IL-15, and IL-18 to enhance production of IFN $\gamma$  by NK cells in many contexts (47). We tested whether IL-15 could act on CD122+Macs to enhance production of IL-12 and other proinflammatory cytokines. The pathogen-associated molecular pattern CpG stimulates BMDMs through TLR9 and induces production of IL-12 (48). CD122+BMDMs co-stimulated with CpG and IL-15 pre-complexed to IL-15R $\alpha$  exhibited enhanced production of proinflammatory cytokines, including IL-12, IL-6, and TNF $\alpha$ . Overall, these data confirm our hypothesis that uterine CD122+Macs are novel cellular targets for IL-15.

## DISCUSSION

Macrophages are critical for successful pregnancy. Severe abnormalities of pregnancy are found in osteopetrotic (*op/op*) mice that lack functional M-CSF and exhibit substantially reduced uterine macrophages (49). Implantation of the embryo is compromised and litter sizes are small relative to M-CSF-sufficient mice. *Op/op* dams cannot be mated with *op/op* sires, as the complete absence of M-CSF is incompatible with gestation of live litters. These data complement a later study showing that inducible deletion of macrophages early in pregnancy causes complete fetal loss, because macrophages sustain the vasculature of ovarian corpus luteum, required to produce progesterone and maintain early pregnancy (50).

Macrophages are abundant at the maternal-fetal interface and have been shown to directly abut blood vessels and NK cells (51). Fetal trophoblasts of the developing placenta are thought to communicate bidirectionally with macrophages, but few studies have formally addressed this (52, 53). These findings suggest that uterine and placental macrophages serve numerous critical functions in pregnancy but are likely heterogeneous. Several groups have investigated macrophage heterogeneity during pregnancy in mice and humans (54, 55), but subsets of uterine macrophages remain incompletely described. In this work, we address a critical unmet need to gain a deeper understanding of signals that drive phenotype and function of macrophages at the maternal-fetal interface.

We found novel and unexpected uterine macrophages that express CD122 and respond to IL-15 under direction of IFNs. While IL-2 also signals to cells expressing CD122 and  $\gamma_c$ , IL-2 is absent from the maternal-fetal interface in the steady state (8). These data suggest that CD122+Macs respond specifically to IL-15 during pregnancy. Gene ontology analysis confirmed that the transcriptome of CD122+Macs is overwhelmingly enriched in ISGs. IFNs are classically produced in response to viral infections, but IFNs are abundant in the cycling uterus and at the maternal-



fetal interface in the steady state. Type-I and -II IFNs were sufficient to drive expression of CD122 on uterine and bone marrow-derived monocytes and macrophages. However, neither Type-I nor Type-II IFN was required, alone or in combination, to generate CD122+Macs from adoptively transferred BM monocytes late in gestation. These data suggest that either a non-Type-I, non-Type-II IFN or another factor altogether can promote development of CD122+Macs in the late gestation uterus, when these experiments were performed. We favor the possibility that Type-III IFN can also play a role in shaping the fate of CD122+Macs. Type-III IFN is the most recently described IFN, and extremely limited information is available about its presence at the maternal-fetal interface (39). Like Type-I and -II IFN, Type-III IFN signals through STAT1 and activates networks of canonical ISGs (56, 57). Of note, Type-III IFN appears to activate a network of genes most similar to that of Type-I IFNs (58). Future investigations are needed to address the effects of Type-III IFN on uterine macrophages.

While any IFNs are capable of directing uterine and placental macrophages to upregulate CD122, it remains to be determined which IFNs do so in vivo during pregnancy. It is possible that several different interferons at several different timepoints in pregnancy act on macrophages, as observed developmental kinetics of CD122+Macs mirrored that of total IFN activity in the uterus and placenta (31). Mouse and human uterine glandular epithelial cells are an established reservoir of Type-I IFN (59, 60). For example, the Type-I IFN $\epsilon$  is produced by uterine epithelium under direction of estrogen (60). This IFN $\epsilon$  may be responsible for the observed population of F4/80<sup>int</sup> CD122+Macs in the non-pregnant, cycling uterus.

Regulation of IFN $\gamma$  during murine pregnancy has been thoroughly described (61). Levels progressively rise to a peak at mid-gestation, after which levels halve but plateau to near-term. The cells upon which we performed gene expression profiling were obtained on E7.5, when levels

of uterine IFN $\gamma$  are known to be relatively low. Consistent with those data, gene expression and gene ontology analyses of CD122+Macs appeared most consistent with a Type-I or -III IFN signature. The transcriptome of CD122+Macs was dominated by ISGs, including *Mx1*, that are induced preferentially in response to IFN-I and -III (56, 62). Further, CD122+Macs are largely MHCII<sup>low</sup> in vivo. Type-II IFN has been shown to enhance expression of MHCII in antigen presenting cells, while IFN-I has been shown to oppose IFN-II-mediated upregulation of MHCII (35). We also showed that treatment of BMDMs with IFN $\gamma$  in vitro led to upregulation of CD122 and MHCII, while treatment of BMDMs with IFN $\alpha$  led to upregulation of CD122 but not MHCII. The IFN system is complex and redundant, particularly the Type-I and Type-III families of IFNs, each composed of several members. This makes isolating individual actors in vivo difficult. Future work will be directed at dissecting this complex system to determine the in vivo IFN requirements for generation of CD122+Macs during pregnancy.

We observed that only macrophages, not other uterine myeloid cells, express CD122. Further, only CD122+Macs, not CD122+ NK cells, experienced a boost in expression of CD122 on a per-cell basis that correlated with increased IFN activity during gestation. One interpretation is that only macrophages are in close enough proximity to the local source of IFN to express CD122 under direction of IFNs. An alternative explanation is that upregulation of CD122 in response to IFN is a mechanism unique to monocytes and macrophages. In support of this latter hypothesis, we provided evidence *in vitro* that M-CSF-derived macrophages, not GM-CSF-derived macrophages, responded to IFN by upregulating CD122. These data point to potential epigenetic regulation of *Il2rb*, encoding CD122, allowing it to be expressed rapidly upon signaling by IFNs. Relatively little is known about transcriptional regulation of *Il2rb* (63, 64), and further investigations into why macrophages uniquely respond to IFN by upregulating CD122 are needed. In summary, our data support the notion that CD122 is a novel, macrophage-specific, IFN-stimulated gene.

Our data show that CD122+Macs can derive from BM monocytes, but the precise precursors of CD122+Macs have yet to be determined. We found evidence of CD122+F4/80<sup>int</sup> cells in the non-pregnant uterus that likely represent CD122+ monocytes. These cells may represent an intermediate through which CD122+Macs transit during gestation. It has long been appreciated that M-CSF is critical for pregnancy and is positively regulated by sex hormones (49, 65, 66). M-CSF concentrations are at or below the limits of detection in the uterus of non-pregnant mice but increase dramatically in the myometrium during gestation, reaching peak concentration at term (28, 65, 66). Indeed, we showed that large, F4/80<sup>bright</sup> macrophages were absent from the non-pregnant uterus. The appearance of these cells in the pregnant uterus suggests they may derive from uterine monocytes exposed to M-CSF. In contrast to the myometrium, concentration of M-CSF is modest and constant in the decidua and placenta as gestation progresses (65). Reinforcing these data, additional work showed maintenance of myeloid cells in the growing myometrium and decline of myeloid populations in the decidua as gestation progresses (28, 29). These data are consistent with our observations that adoptively transferred monocytes converted into F4/80<sup>bright</sup>CD122+Macs in the myometrium but not the decidua or placenta late in gestation (data not shown). Altogether, these data are consistent with a model in which BM monocytes are directed to develop into F4/80<sup>bright</sup> CD122+Macs by M-CSF and IFNs.

Finally, we found that stimulation with IL-15 resulted in phosphorylation of ERK and increased production of IL-6, IL-12, and TNF $\alpha$  in CD122+Macs stimulated with CpG. While we have yet to understand the specific stimuli responsible for activating uterine and placental macrophages in vivo, it is feasible that CD122+Macs respond to IL-15 to support production of IFN $\gamma$  at the maternal-fetal interface. Establishing this link may have major clinical relevance. Monocytes and macrophages are known in many contexts to secrete IL-12 to promote IFN $\gamma$  production by

neighboring innate and adaptive immune cells (21). Mice deficient in IFN $\gamma$  signaling fail to remodel uterine spiral arteries into low-resistance, high-capacitance vessels (12). In the mouse, this has been attributed to defective production of IFN $\gamma$  by NK cells. Further, IL-12 and IL-18 appear to play a key role in production of IFN $\gamma$  at the maternal fetal interface, as mice deficient in either or both of these cytokines exhibit similarly abnormal uterine artery remodeling as does the IFN $\gamma$  KO mouse (44). Thus, these mice develop the correlate of human preeclampsia (12, 67). Investigations into the IL-15-dependent and IL-15-independent functions of CD122+Macs in pregnancy are ongoing and may shed light on new therapies for preeclampsia.

Lending validation to our findings in the mouse, we discovered that human deciduae contained a population of CD122+Macs. We observed that these cells phenocopied mouse CD122+Macs, with expression of CD122 and modest levels of NK cell markers, such as CD56, Perforin, and Granzyme. Human CD122+Macs were not as abundant as mouse CD122+Macs early in gestation, but we have yet to fully explore how this population changes over gestation in humans. We also have yet to formally determine whether these human womb-associated, killer-like macrophages develop, signal, and function like their murine counterparts. A prior report supports the notion that IFNs may be able to drive expression of CD122 in human macrophages, as cultured human blood monocytes can express CD122 after culture in high-dose IFN $\gamma$  (68). Our findings greatly extend and provide critical context for these prior data. How IFNs signal to human monocytes and macrophages is a key area of ongoing investigation with clear implications for human pregnancy.

In summary, we have revealed that IFNs act on uterine macrophages to generate an entirely new and unexpected IL-15-responsive cell type at the maternal-fetal interface, the CD122+ macrophage. Given the importance of IL-15 in pregnancy, modulation of CD122+Macs may

represent a novel therapeutic target to support pregnancies threatened by fetal growth restriction, fetal loss, and preeclampsia.

## METHODS

*Preparation of single-cell suspensions.* Organs of interest were grossly dissected, weighed, minced finely with scissors, and digested in medium containing Liberase TM (Roche) at a final concentration of 0.28WU/mL and DNase (Roche) at a final concentration 30µg/mL for 30 min at 37°C with intermittent agitation. Cells were passed through a 70µm filter, and red blood cells were lysed with ACK lysis buffer. Cells were again filtered and counted with a Countess hemocytometer (Thermo Fisher Scientific) prior to proceeding to antibody staining for flow cytometry or cell sorting.

*Flow cytometry and cell sorting.* Flow cytometry was performed on either a MacsQuant Analyzer 10 (Miltenyi), an LSRFortessa (BD), or a CytoFLEX LX (Beckman Coulter). Cell sorting was performed on either a FACSARIA Fusion (BD) or a MoFlo Astrios EQ (Beckman Coulter). Data were exported as FCS files and analyzed using FlowJo 10 software. All antibody staining was performed at 4°C in the dark. Prior to fluorescent antibody staining, cells were incubated with mouse Fc block (TruStain FcX, Biolegend) or human Fc block (BD). Fixable, fluorescent LIVE/DEAD viability dye (Thermo Fisher) was used in Blue, Aqua, Green, and Near-IR per manufacturer recommendations. All antibodies, clones, and concentrations used for flow cytometry and cell sorting are listed in Supplemental Table 1.

*Microarray.* Sorted cells were pelleted, removed of medium, snap-frozen on dry ice, and stored at -80C. RNA was isolated using a Micro RNeasy mini total RNA kit (Qiagen), performed according to the manufacturer's instructions. MouseGene 1.0ST chips were used. Raw data are available in GEO. Microarray data were normalized by the Robust Multichip Average (RMA) algorithm and log<sub>2</sub> transformed using the oligo package in R (69). Linear modeling to obtain differentially expressed genes was performed with the limma package in R (70). A gene was

considered significantly differentially expressed with a FDR-adjusted p value less than 0.05. A gene met threshold fold change criteria with an absolute fold change of +/- 1.5. Gene ontology (GO) analysis was performed using DAVID (71, 72).

*Adoptive transfers.* Single-cell suspensions of bulk bone marrow (BM) were obtained from pooled femorae, tibiae, and humeri of donor mice. Red blood cells were lysed with ACK lysis buffer, and cells were filtered through a 70µm filter. Monocytes were enriched with a mouse BM monocyte isolation kit (Miltenyi) by magnetic bead-mediated depletion of non-monocytes. Manufacturer instructions were followed exactly. Purity of transferred BM monocytes was routinely ~90% prior to adoptive transfer.

*Bone marrow-derived macrophages (BMDMs).* Single-cell suspensions of BM were prepared as above. Adherent cells were removed by incubating bulk bone marrow cells on tissue culture-treated plates for at least 2 hours in complete DMEM (cDMEM, 10% FBS, 1% Pencillin/Streptomycin/Glutamine). Non-adherent cells were then collected, counted, and plated at  $5 \times 10^5$  cells/mL in cDMEM containing 10% L929 cell-conditioned medium (LCM, made in our laboratory) for 5-7 days. GM-BMDMs were generated by culturing non-adherent BM cells in cDMEM supplemented with 50ng/mL GM-CSF (Peprotech). CD122+BMDMs were generated by adding 1ng/mL IFN $\alpha$  (Biolegend) to the medium on day 5 of culture. When testing ability of IFN $\gamma$  (Peprotech) to derive CD122+Macs, doses indicated were added on day 5 of culture. Anti-IFNAR and anti-IFNGR (both BioXcell) were both used at 10µg/mL in culture.

*ELISA.* CD122+BMDMs were generated as above. Cells were washed on day 6 of culture, and medium was replaced with DMEM containing 3% serum for the final 16 hours of culture with or without 1µg/mL CpG 1826 (IDT), as indicated. To this medium, IL-15R $\alpha$  alone (IL-15R $\alpha$  Fc

chimera protein, R&D Systems) or IL-15R $\alpha$  pre-complexed with IL-15 (PeproTech) was added, as indicated. Final concentrations of IL-15R $\alpha$  and IL-15 were 100ng/mL and 50ng/mL, respectively. Complexing of IL-15R $\alpha$  with IL-15 was performed in PBS at 37°C for 30 minutes. OptEIA ELISA kits (BD) for mouse were used: IL-6, IL-12 (p70), and TNF. Manufacturer instructions were followed precisely, and concentrations of cytokines were determined with a SpectraMax ELISA plate reader.

*Western blots.* CD122<sup>+</sup>BMDMs were generated as above. Cells were washed on day 6 of culture, and medium was replaced with serum-free DMEM for 2 hours. Medium was replaced with cDMEM containing IL-15R $\alpha$  alone or IL-15R $\alpha$ /IL-15 complex, as above, for 20 minutes. Whole-cell lysates were then prepared by washing cells in cold PBS and lysing in M-PER Mammalian Protein Extraction Reagent (Thermo Scientific) with protease/phosphatase inhibitor cocktail (Cell Signaling Technology). Lysates were quantified by Bradford assay, normalized, reduced, and resolved by SDS gel electrophoresis on 10% Bis-Tris gels (Invitrogen). Resolved proteins were transferred to 0.45  $\mu$ m Nitrocellulose membranes (Bio-Rad). Membranes were blocked in Odyssey Blocking Buffer (Licor) and probed with the following antibodies: pERK (Cell Signaling Technology, 1:1000), total ERK (Cell Signaling Technology, 1:1000), and GAPDH (Novus Bio, 1:2000). Membranes were incubated with the following secondary antibodies at a dilution of 1:20,000: Alexa Fluor 680 donkey anti-rabbit IgG (Invitrogen) or Alexa Fluor Plus 800 donkey anti-mouse IgG (Invitrogen). Proteins were detected and quantified using a LICOR Odyssey.

*Human endometrial samples.* Endometrial biopsies were obtained from patients and volunteers at Penn Fertility Care. MAM has approval for the collection endometrial tissue (IRB# 826813). Written informed consent was obtained from all subjects. All women were between the ages of



18 and 43, with no significant medical history and regular menstrual cycles (between 25-35 days over the past 3 months). Endometrial biopsies were obtained from known fertile women 8 days after an LH surge (secretory phase), which was detected in the urine by the Clearblue Ovulation Test. All biopsies were obtained using a Pipelle Endometrial Suction Curette (Cooper Surgical). All biopsies were dissociated and analyzed within 24 hours of collection. Single cell suspensions were obtained as above.

*First trimester decidual tissue.* First trimester decidual tissue was obtained from the Penn Family Planning and Pregnancy Loss center. MAM has IRB approval for the collection of first trimester extraembryonic tissue (IRB# 827072). Written informed consent was obtained from all subjects. After tissue collection, decidua was manually separated from chorionic villi based on gross morphology. All samples were dissociated and analyzed within 24 hours of collection. Single cell suspensions were obtained as above.

*Statistics.* For non-microarray data, statistical analyses were performed using GraphPad Prism 8. A (non-parametric) Wilcoxon matched-pairs signed rank test was used to compare effect of IL-15 treatment on matched samples. A 2-way ANOVA was used to analyze the interaction between 2 independent variables on the dependent variable. Tukey's multiple comparisons testing was used to compare mean values among columns. A 1-way ANOVA with a test for linear trend was used to determine whether the slope of a line was likely to have occurred by chance alone.  $P < 0.05$  was considered significant.

*Mice.* All animals were housed, cared for, and euthanized in accordance with a protocol approved by the Institutional Animal Care and Use Committee (IACUC) of Children's Hospital of Philadelphia. Wild-type mice were strain C57Bl/6, and all knockout mice were on a C57Bl/6 background. *Ifnar*<sup>-/-</sup>, *Ifngr*<sup>-/-</sup>, and *Ifnar*<sup>-/-</sup>*Ifngr*<sup>-/-</sup> mice, LysM-Cre and DTR-mCherry transgenic mice

intercrossed to yield MM-DTR mice, and CD45.1 mice were all purchased from The Jackson Laboratory. All animals used were between 6-12 weeks of age. While it was only possible to use female mice to investigate uterine immune cells, both male and female mice were used for *in vitro* experiments, yielding similar results. For pregnant female mice, presence of copulation plugs were checked early each morning. Copulation was assumed to take place during the 12-hour dark cycle (from 6PM-6AM in our facility). Thus, E0.5 denotes the morning that a copulation plug was first detected.

## **AUTHOR CONTRIBUTIONS**

SMG, MAN, and SM performed experiments. SMG and EMB wrote the manuscript. MAN, SM, and MAM critically reviewed the manuscript.

## **ACKNOWLEDGMENTS**

This work was supported by NIH grants R01 AI121250-A1 (E.M.B.); NIH grant T32 AI 118684, the Section on Neonatal-Perinatal Medicine of the American Academy of Pediatrics, the Children's Hospital of Philadelphia Research Institute, and the Division of Neonatology of Children's Hospital of Philadelphia (S.M.G.); Penn University Research Foundation and March of Dimes Prematurity Research Center at the University of Pennsylvania (M.A.M.).

## FIGURES AND FIGURE LEGENDS

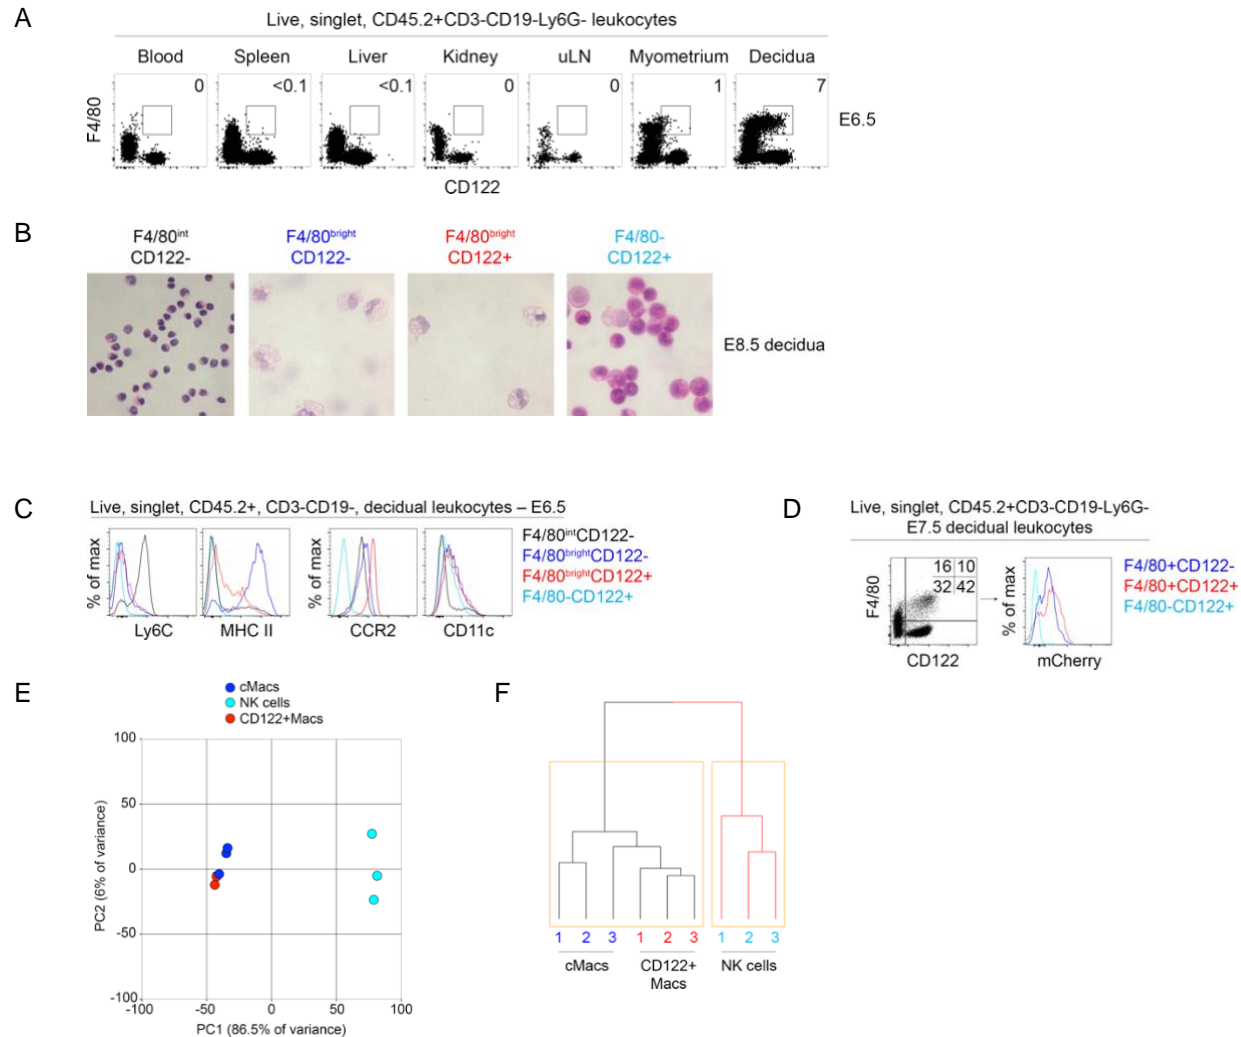

**Figure 1. Macrophages expressing CD122 are unique to the uterus in mice.** (A) CD122<sup>+</sup>F4/80<sup>bright</sup> cells are evident uniquely in the uterus. Numbers denote percent in gate out of total live, singlet, CD45.2+CD3-CD19-Ly6G- leukocytes on embryonic day (“E”) 6.5 in mice. Data are representative of at least 3 independent experiments. (B) From left, CD122<sup>-</sup>F4/80<sup>int</sup> cells are morphologically monocyte-like, all F4/80<sup>bright</sup> cells are macrophage-like, and CD122<sup>+</sup>F4/80<sup>-</sup> cells are NK-like. Indicated cells were FACS-sorted and stained with hematoxylin and eosin. Data are representative of at least 2 independent experiments. (C) Phenotypically, CD122<sup>+</sup>F4/80<sup>bright</sup> cells are macrophage-like but express less MHC Class II and more CCR2 than CD122<sup>-</sup>F4/80<sup>bright</sup> cells. Data are representative of at least 5 independent experiments. (D) Co-expression of *Ly22* (LysM) and *Csf1r* (M-CSFR), as reported by mCherry, in macrophages but not NK cells. In “MM-DTR” mice, LysM-Cre acts on a transgene containing *Csf1r* promoter elements, followed by a floxed STOP cassette, followed by an mCherry-Diphtheria toxin receptor fusion protein to specifically label macrophages. Expression of mCherry directly correlates with expression of F4/80. Data are representative of at least 5 independent experiments. (E, F) Transcriptionally, CD122<sup>+</sup>F4/80<sup>bright</sup> cells (CD122<sup>+</sup> macrophages, CD122<sup>+</sup>Macs) cluster with CD122<sup>-</sup>F4/80<sup>bright</sup> cells (conventional macrophages, cMacs) by (E) principal component analysis (PCA) and by (F) hierarchical clustering analysis (HCA). Macs do not cluster with NK cells (CD122<sup>-</sup>F4/80<sup>-</sup>). Prior to PCA and HCA, control probes and low-variance probes in microarray data were filtered out. Indicated cells were FACS-sorted from 3 independent groups of pooled E7.5 deciduae, with each group consisting of 4-5 mice.

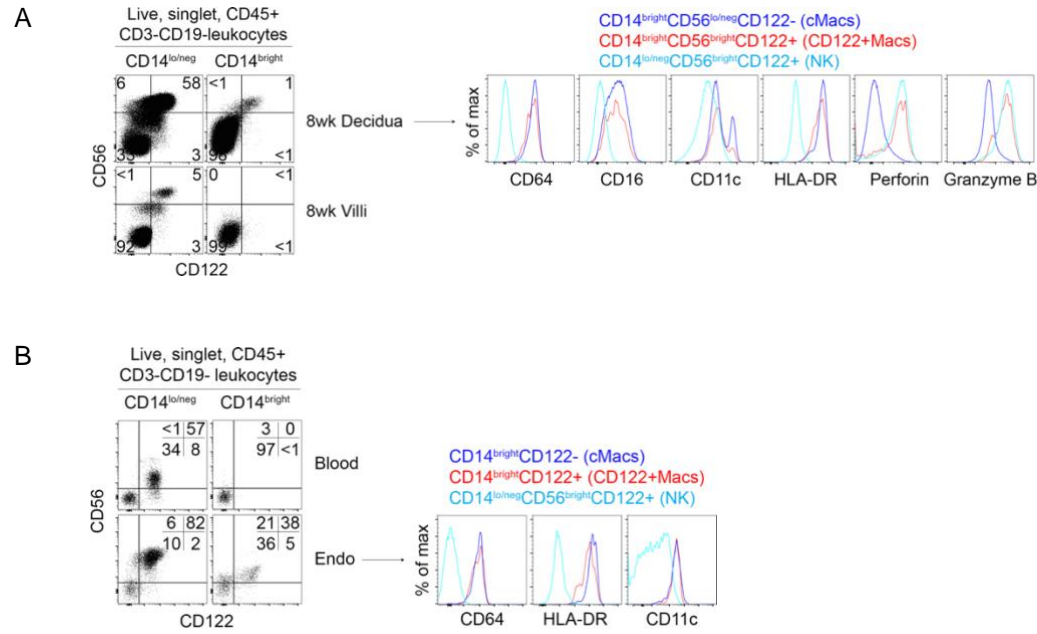

**Figure 2. Human CD122+Macs are unique to the uterus before and during pregnancy.** (A) Human equivalent of murine CD122+Macs in first-trimester decidual tissue, but not first-trimester chorionic villi, from 8-week elective termination of pregnancy. Phenotypically, human CD122+Macs express many markers of the macrophage lineage. Human CD122+Macs diverge from human cMacs by expressing high levels of CD122, CD56, Perforin, and Granzyme B. Additional examples are shown in Supplemental Figure 3. (B) Human CD122+Macs in secretory phase endometrium during the implantation window but not in blood from the same subject. Additional examples are shown in Supplemental Figure 4.

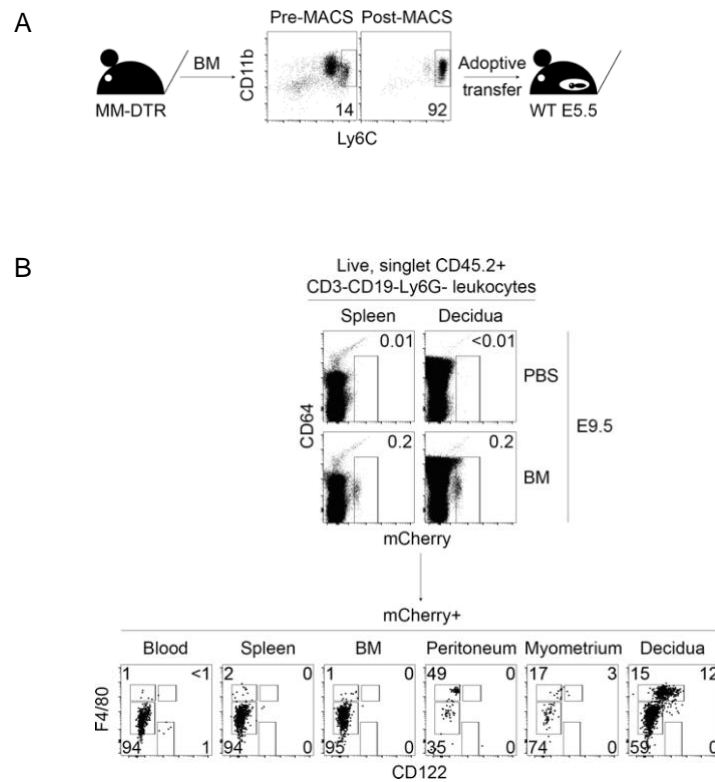

**Figure 3. Bone marrow monocytes give rise to CD122+Macs only at the maternal-fetal interface.** (A) Bone marrow monocytes from MM-DTR mice were enriched by magnetic-activated cell sorting (MACS) from non-pregnant mice prior to adoptive transfer into post-implantation pregnant mice. (B) Uterine CD122+Macs can derive from bone marrow (BM) monocytes. (Top panels) Four days after i.v. adoptive transfer of MM-DTR BM monocytes, mCherry+ (donor-derived) cells were recovered from recipients. Control mice received i.v. saline (PBS). Data are representative of at least 3 independent experiments.



A

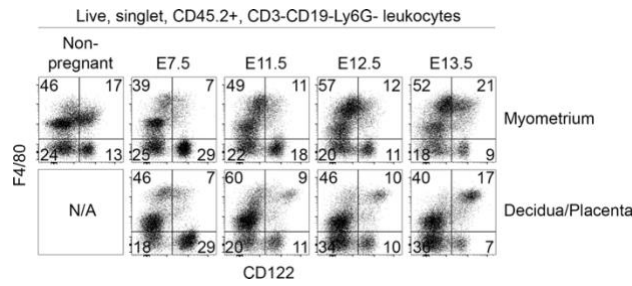

B

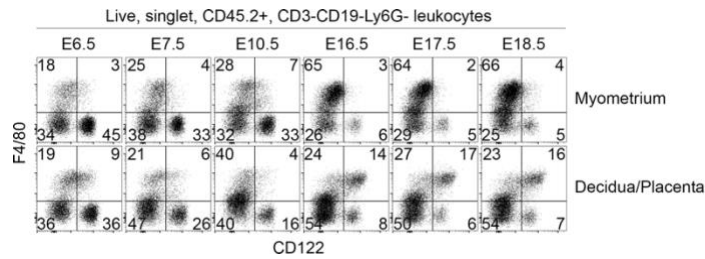

C

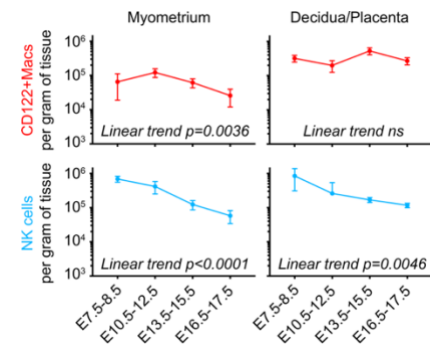

**Figure 4. Population dynamics of CD122+Macs differ between myometrium and deciduo-placental unit.** (A) CD122+F4/80<sup>int</sup> monocytes are evident in the non-pregnant myometrium. (A, B) The myometrium is progressively enriched in CD122+Macs over the course of gestation, until the sudden decline of CD122+Macs at E16.5 and beyond. The decidua or combined deciduo-placental unit is progressively enriched in CD122+Macs as gestation progresses toward term. “N/A”, not applicable. Data are representative of at least 3 independent experiments. (C) Quantification of numbers of CD122+Macs and NK cells per gram of indicated tissue shows that CD122+Macs decline over gestation in the myometrium but remain constant in the decidua/placenta. NK cells decline over time in both the myometrium and decidua/placenta. Data are representative of 3-5 individual mice per timepoint. P values were generated by one-way ANOVA with a test for linear trend to assess changes in cell number per gram of tissue over time. “ns”, not significant,  $p=0.38$ .

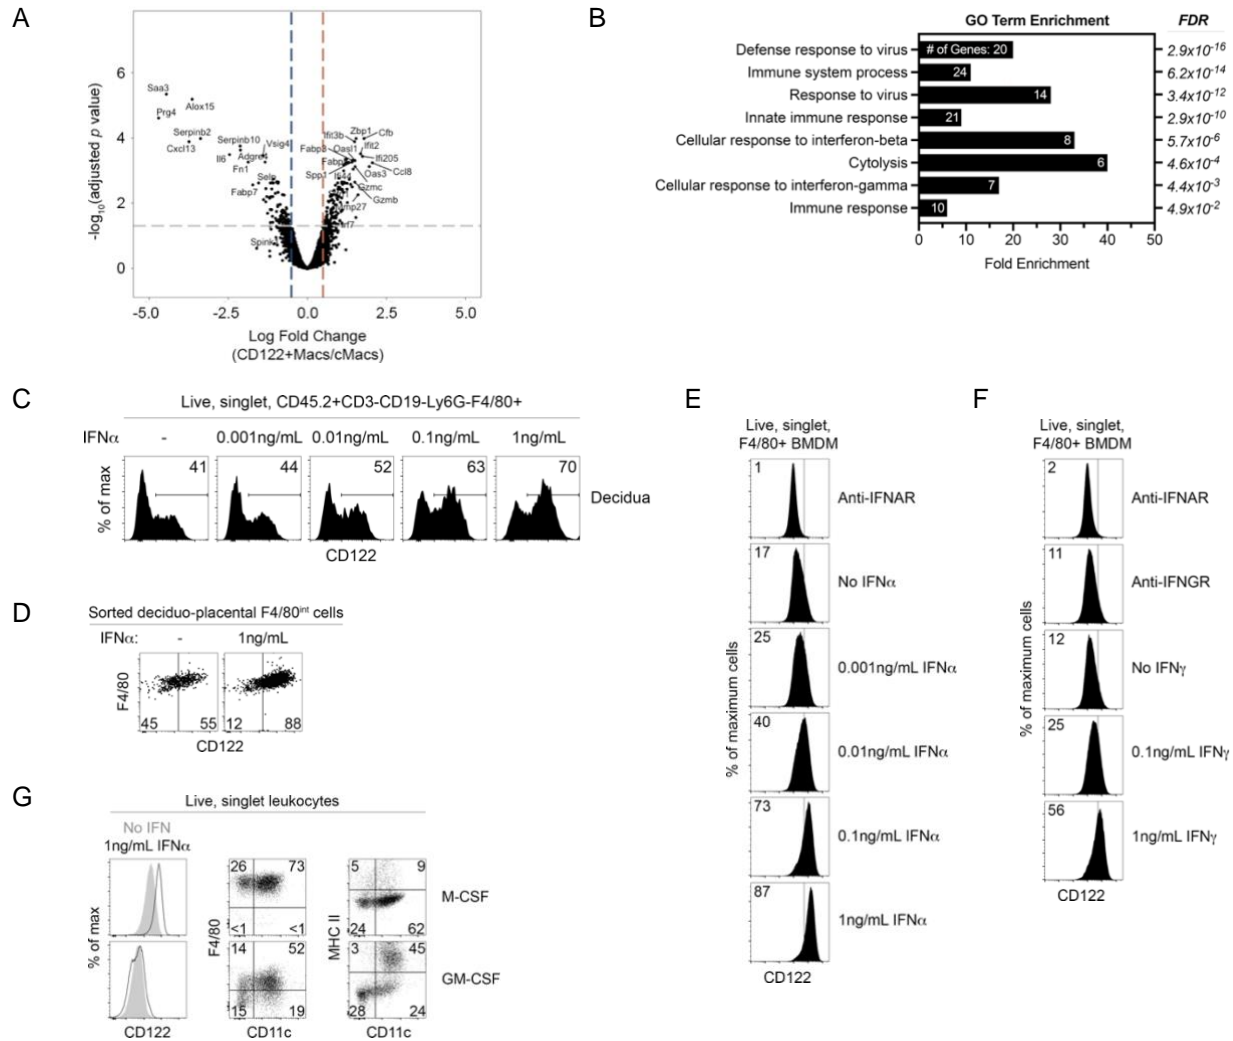

**Figure 5. Type-I and -II IFNs are sufficient to drive expression of CD122 on M-CSF-derived macrophages.** (A, B) Interferon-responsive genes (ISGs) are overrepresented among genes significantly enriched in E7.5 decidual CD122+Macs relative to cMacs by microarray. (A) Volcano plot showing transcripts passing threshold for significance [false discovery rate (FDR)-adjusted  $p < 0.05$ ] and log fold change (0.6, corresponding to over 1.5-fold change). Top 30 most differentially expressed transcripts are labeled. (B) Gene ontology (GO) analysis by DAVID of all genes significantly enriched in CD122+Macs relative to cMacs. Bars show fold enrichment for indicated GO Biological Process (GO BP) terms significantly enriched with FDR-adjusted  $p < 0.05$ . GO terms are represented by the number of genes shown in each bar. (C) Decidual F4/80+ cells upregulate CD122 in a dose-dependent fashion after 18hrs in culture with M-CSF and IFN $\alpha$ . Bulk E6.5 decidual cell suspensions were cultured in indicated concentrations of IFN $\alpha$ . Data are representative of at least 2 independent experiments. (D) Monocytes (CD122-F4/80<sup>int</sup>) sorted from E15.5 decidual/placenta upregulate CD122 after 24 hours in culture with M-CSF and IFN $\alpha$ . Data are representative of at least 2 independent experiments. (E, F) Dose-dependent upregulation of CD122 on bone marrow-derived macrophages (BMDMs) cultured with M-CSF and (E) Type-I IFN $\alpha$  or (F) Type-II IFN $\gamma$ . Data are representative of at least 5 independent experiments. (G) Culture of bone marrow in M-CSF, not granulocyte/macrophage colony-stimulating factor (GM-CSF), permits induction of CD122 in response to IFN. Data are representative of at least 3 independent experiments.

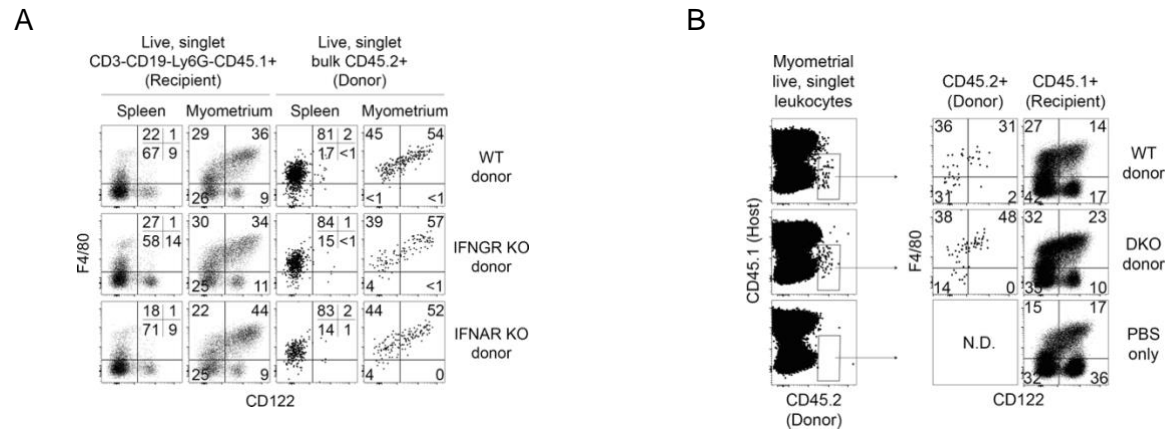

**Figure 6. Neither Type I nor Type II IFN is required to generate uterine CD122+Macs *in vivo*.** (A) MACS-enriched BM monocytes singly-deficient in either IFN $\gamma$  receptor (IFNGR KO) or IFN $\alpha$  receptor (IFNAR KO) are capable of giving rise to uterine CD122+Macs. (B) MACS-enriched BM monocytes doubly-deficient in both IFNGR and IFNAR KO (double KO, DKO) are capable of giving rise to uterine CD122+Macs. BM monocytes from indicated non-pregnant donor mice (CD45.2+) were adoptively transferred into congenic (CD45.1+) peri-implantation pregnant recipient mice. Indicated organs were analyzed at E15.5. Late in gestation, transferred cells were recovered predominantly from myometrium and not from decidua/placenta. Data are representative of at least 2 independent experiments.

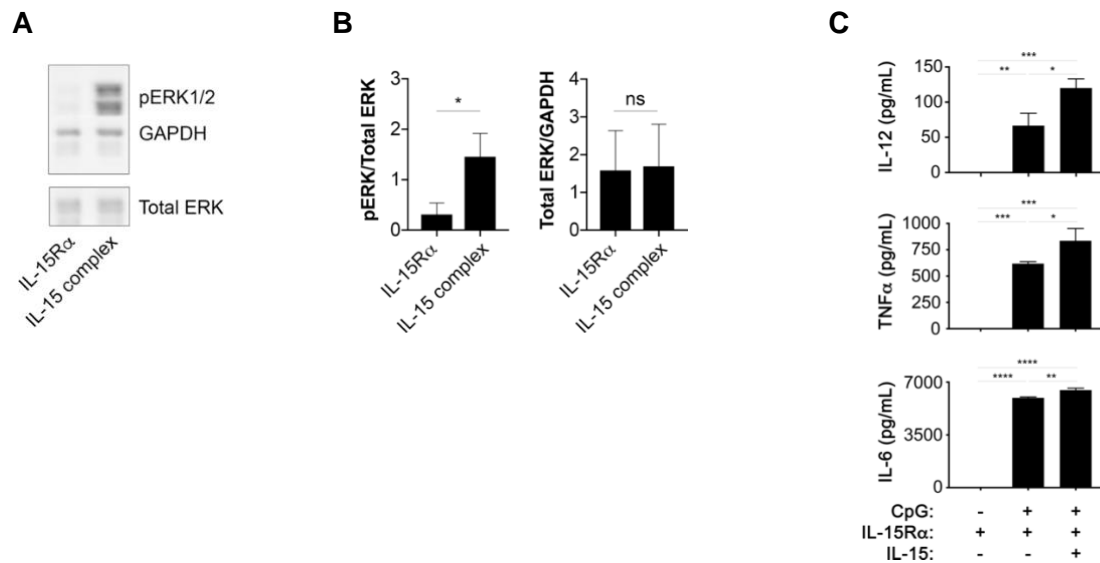

**Figure 7. CD122+Macs signal and exhibit enhanced function in response to IL-15.** (A) Phosphorylation of ERK1/2 (pERK1/2) by Western blot of CD122+BMDMs after 30 minutes of stimulation with IL-15 complex (recombinant murine IL-15 pre-complexed to recombinant murine IL-15Rα). “IL-15Rα” denotes addition of only recombinant IL-15Rα. (B) Increased pERK by Western is not due to increased total ERK. \*, p=0.016 by the Wilcoxon matched-pairs signed rank test, includes 7 individual mice over 2 independent experiments. “ns”, not significant. (C) CD122+BMDMs co-stimulated with IL-15 complex and CpG produce more IL-12, TNFα, and IL-6 by ELISA than 122+BMDMs stimulated with CpG alone. BMDMs were stimulated for 16 hours, after which supernatants were collected for ELISA. \*p<0.05, \*\*p<0.01, \*\*\*p<0.001, \*\*\*\*p<0.0001 by two-way ANOVA (to test for any significant variance from individual mice, of which there was none) and Tukey’s multiple comparisons test. Data are representative of at least 2 independent experiments, with BMDMs generated from 3 individual mice per group.

# REFERENCES

1. Billington WD. The immunological problem of pregnancy: 50 years with the hope of progress. A tribute to Peter Medawar. *J. Reprod. Immunol.* 2003;60(1):1–11.
2. Yockey LJ, Iwasaki A. Interferons and Proinflammatory Cytokines in Pregnancy and Fetal Development. *Immunity* 2018;49(3):397–412.
3. Barber EM, Pollard JW. The Uterine NK Cell Population Requires IL-15 but These Cells Are Not Required for Pregnancy nor the Resolution of a *Listeria monocytogenes* Infection. *The Journal of Immunology* 2003;171(1):37–46.
4. Lee AJ, Kandiah N, Karimi K, Clark DA, Ashkar AA. Interleukin-15 is required for maximal lipopolysaccharide-induced abortion. *J Leukoc Biol* 2013;93(6):905–912.
5. Gathiram P, Moodley J. Pre-eclampsia: its pathogenesis and pathophysiology. *Cardiovasc J Afr* 2016;27(2):71–78.
6. Agarwal R, Loganath A, Roy AC, Wong YC, Ng SC. Expression profiles of interleukin-15 in early and late gestational human placenta and in pre-eclamptic placenta. *Molecular Human Reproduction* 2001;7(1):97–101.
7. Toth B et al. Placental Interleukin-15 Expression in Recurrent Miscarriage. *Am J Reprod Immunol* 2010;64(6):402–410.
8. Ye W, Zheng LM, Young JD, Liu CC. The involvement of interleukin (IL)-15 in regulating the differentiation of granulated metrial gland cells in mouse pregnant uterus. *Journal of Experimental Medicine* 1996;184(6):2405–2410.
9. Kitaya K et al. IL-15 expression at human endometrium and decidua. *Biology of Reproduction* 2000;63(3):683–687.
10. Jabri B, Abadie V. IL-15 functions as a danger signal to regulate tissue-resident T cells and tissue destruction. *Nature Reviews Immunology* 2015;15(12):771–783.
11. Větvicka V, Bilej M, Kincade PW. Resistance of macrophages to 5-fluorouracil treatment. *Immunopharmacology* 1990;19(2):131–138.
12. Ashkar AA, Di Santo JP, Croy BA. Interferon gamma contributes to initiation of uterine vascular modification, decidual integrity, and uterine natural killer cell maturation during normal murine pregnancy. *Journal of Experimental Medicine* 2000;192(2):259–270.
13. Barber EM, Pollard JW. The Uterine NK Cell Population Requires IL-15 but These Cells Are Not Required for Pregnancy nor the Resolution of a *Listeria monocytogenes* Infection. *The Journal of Immunology* 2003;171(1):37–46.
14. Ashkar AA et al. Assessment of Requirements for IL-15 and IFN Regulatory Factors in Uterine NK Cell Differentiation and Function During Pregnancy. *The Journal of Immunology* 2003;171(6):2937–2944.

15. Dokras A et al. Severe feto-placental abnormalities precede the onset of hypertension and proteinuria in a mouse model of preeclampsia. *Biology of Reproduction* 2006;75(6):899–907.
16. Sones JL et al. Decidual Cox2 inhibition improves fetal and maternal outcomes in a preeclampsia-like mouse model. *JCI Insight* 2016;1(3):337–17.
17. Theurich S et al. IL-6/Stat3-Dependent Induction of a Distinct, Obesity-Associated NK Cell Subpopulation Deteriorates Energy and Glucose Homeostasis. *Cell Metabolism* 2017;26(1):171–184.e6.
18. Fu B et al. Natural Killer Cells Promote Fetal Development through the Secretion of Growth-Promoting Factors. *Immunity* 2017;47(6):1100–1113.e6.
19. Gordon SM et al. The transcription factors T-bet and Eomes control key checkpoints of natural killer cell maturation. *Immunity* 2012;36(1):55–67.
20. Doisne J-M et al. Composition, Development, and Function of Uterine Innate Lymphoid Cells. *J. Immunol.* 2015;195(8):3937–3945.
21. Schreiber HA et al. Intestinal monocytes and macrophages are required for T cell polarization in response to *Citrobacter rodentium*. *J. Exp. Med.* 2013;210(10):2025–2039.
22. Quell KM et al. Monitoring C3aR Expression Using a Floxed tdTomato-C3aR Reporter Knock-in Mouse. *J. Immunol.* 2017;199(2):688–706.
23. Vento-Tormo R et al. Single-cell reconstruction of the early maternal–fetal interface in humans. *Nature* 2018;:1–26.
24. Koopman LA et al. Human Decidual Natural Killer Cells Are a Unique NK Cell Subset with Immunomodulatory Potential. *Journal of Experimental Medicine* 2003;198(8):1201–1212.
25. Van Acker HH, Capsomidis A, Smits EL, Van Tendeloo VF. CD56 in the Immune System: More Than a Marker for Cytotoxicity? *Front Immunol* 2017;8:892.
26. Perdiguero EG, Geissmann F. The development and maintenance of resident macrophages. *Nat. Immunol.* 2016;17(1):2–8.
27. Ginhoux F, Guillemin M. Tissue-Resident Macrophage Ontogeny and Homeostasis. *Immunity* 2016;44(3):439–449.
28. Tagliani E et al. Coordinate regulation of tissue macrophage and dendritic cell population dynamics by CSF-1. *J. Exp. Med.* 2011;208(9):1901–1916.
29. Collins MK, Tay C-S, Erlebacher A. Dendritic cell entrapment within the pregnant uterus inhibits immune surveillance of the maternal/fetal interface in mice. *J. Clin. Invest.* 2009;119(7):2062–2073.
30. Wang C et al. Granulated metrial gland cells in the murine uterus: localization, kinetics, and the functional role in angiogenesis during pregnancy. *Microsc. Res. Tech.* 2003;60(4):420–429.
31. Fowler AK, Reed CD, Giron DJ. Identification of an interferon in murine placentas. *Nature* 1980;286(5770):266–267.



32. Hermant P, Francius C, Clotman F, Michiels T. IFN- $\epsilon$  is constitutively expressed by cells of the reproductive tract and is inefficiently secreted by fibroblasts and cell lines. *PLoS ONE* 2013;8(8):e71320.
33. Platt JS, Hunt JS. Interferon-gamma gene expression in cycling and pregnant mouse uterus: temporal aspects and cellular localization. *J Leukoc Biol* 1998;64(3):393–400.
34. Moore RN, Larsen HS, Horohov DW, Rouse BT. Endogenous regulation of macrophage proliferative expansion by colony-stimulating factor-induced interferon. *Science* 1984;223(4632):178–181.
35. Lu HT et al. Interferon (IFN) beta acts downstream of IFN-gamma-induced class II transactivator messenger RNA accumulation to block major histocompatibility complex class II gene expression and requires the 48-kD DNA-binding protein, ISGF3-gamma. *Journal of Experimental Medicine* 1995;182(5):1517–1525.
36. Lari R et al. Macrophage lineage phenotypes and osteoclastogenesis--complexity in the control by GM-CSF and TGF-beta. *Bone* 2007;40(2):323–336.
37. Fleetwood AJ, Dinh H, Cook AD, Hertzog PJ, Hamilton JA. GM-CSF- and M-CSF-dependent macrophage phenotypes display differential dependence on type I interferon signaling. *J Leukoc Biol* 2009;86(2):411–421.
38. Bayer A et al. Type III Interferons Produced by Human Placental Trophoblasts Confer Protection against Zika Virus Infection. *Cell Host and Microbe* 2016;19(5):705–712.
39. Jagger BW et al. Gestational Stage and IFN- $\lambda$  Signaling Regulate ZIKV Infection In Utero. *Cell Host and Microbe* 2017;22(3):366–376.e3.
40. Adunyah SE, Wheeler BJ, Cooper RS. Evidence for the involvement of LCK and MAP kinase (ERK-1) in the signal transduction mechanism of interleukin-15. *Biochem. Biophys. Res. Commun.* 1997;232(3):754–758.
41. Rubinstein MP et al. Converting IL-15 to a superagonist by binding to soluble IL-15R $\alpha$ . *PNAS* 2006;103(24):9166–9171.
42. Colpitts SL et al. Transcriptional Regulation of IL-15 Expression during Hematopoiesis. *The Journal of Immunology* 2013;191(6):3017–3024.
43. Marra P et al. IL15RA drives antagonistic mechanisms of cancer development and immune control in lymphocyte-enriched triple-negative breast cancers. *Cancer Research* 2014;74(17):4908–4921.
44. Zhang JH et al. Analysis of Cytokine Regulators Inducing Interferon Production by Mouse Uterine Natural Killer Cells1. *Biology of Reproduction* 2003;69(2):404–411.
45. Puzanov IJ, Bennett M, Kumar V. IL-15 can substitute for the marrow microenvironment in the differentiation of natural killer cells. *The Journal of Immunology* 1996;157(10):4282–4285.
46. Koka R et al. Interleukin (IL)-15R $\alpha$ -deficient Natural Killer Cells Survive in Normal but Not IL-15R $\alpha$ -deficient Mice. *Journal of Experimental Medicine* 2003;197(8):977–984.

47. Michel T, Hentges F, Zimmer J. Consequences of the crosstalk between monocytes/macrophages and natural killer cells. *Front Immunol* 2012;3:403.
48. Cowdery JS, Boerth NJ, Norian LA, Myung PS, Koretzky GA. Differential regulation of the IL-12 p40 promoter and of p40 secretion by CpG DNA and lipopolysaccharide. *The Journal of Immunology* 1999;162(11):6770–6775.
49. Pollard JW, Hunt JS, Wiktor-Jedrzejczak W, Stanley ER. A pregnancy defect in the osteopetrotic (op/op) mouse demonstrates the requirement for CSF-1 in female fertility. *Developmental Biology* 1991;148(1):273–283.
50. Care AS et al. Macrophages regulate corpus luteum development during embryo implantation in mice. *J. Clin. Invest.* 2013;123(8):3472–3487.
51. Erlebacher A. Immunology of the maternal-fetal interface. *Annu. Rev. Immunol.* 2013;31(1):387–411.
52. Fest S et al. Trophoblast-macrophage interactions: a regulatory network for the protection of pregnancy. *Am J Reprod Immunol* 2007;57(1):55–66.
53. Fock V et al. Macrophage-derived IL-33 is a critical factor for placental growth. *J. Immunol.* 2013;191(7):3734–3743.
54. Houser BL, Tilburgs T, Hill J, Nicotra ML, Strominger JL. Two unique human decidual macrophage populations. *J. Immunol.* 2011;186(4):2633–2642.
55. Zhao H et al. Unique roles of infiltrating myeloid cells in the murine uterus during early to midpregnancy. *J. Immunol.* 2015;194(8):3713–3722.
56. Kotenko SV et al. IFN-λs mediate antiviral protection through a distinct class II cytokine receptor complex. *Nat. Immunol.* 2003;4(1):69.
57. Dickensheets H, Sheikh F, Park O, Gao B, Donnelly RP. Interferon-lambda (IFN-λ) induces signal transduction and gene expression in human hepatocytes, but not in lymphocytes or monocytes. *J Leukoc Biol* 2013;93(3):377–385.
58. Donnelly RP, Kotenko SV. Interferon-lambda: a new addition to an old family. *J. Interferon Cytokine Res.* 2010;30(8):555–564.
59. Bulmer JN, Morrison L, Johnson PM, Meager A. Immunohistochemical localization of interferons in human placental tissues in normal, ectopic, and molar pregnancy. *Am J Reprod Immunol* 1990;22(3-4):109–116.
60. Fung KY et al. Interferon-ε protects the female reproductive tract from viral and bacterial infection. *Science* 2013;339(6123):1088–1092.
61. Ashkar AA, Croy BA. Interferon-gamma contributes to the normalcy of murine pregnancy. *Biology of Reproduction* 1999;61(2):493–502.
62. Aebi M et al. cDNA structures and regulation of two interferon-induced human Mx proteins. *Molecular and Cellular Biology* 1989;9(11):5062–5072.



63. Ye S-K et al. Transcriptional regulation of the mouse interleukin-2 receptor beta chain gene by Ets and Egr-1. *Biochem. Biophys. Res. Commun.* 2005;329(3):1094–1101.
64. Ohno S-I et al. Runx proteins are involved in regulation of CD122, Ly49 family and IFN- $\gamma$  expression during NK cell differentiation. *Int. Immunol.* 2007;20(1):71–79.
65. Bartocci A, Pollard JW, Stanley ER. Regulation of colony-stimulating factor 1 during pregnancy. *Journal of Experimental Medicine* 1986;164(3):956–961.
66. Pollard JW et al. Apparent role of the macrophage growth factor, CSF-1, in placental development. *Nature* 1987;330(6147):484–486.
67. Zhang J, Adams MA, Croy BA. Alterations in maternal and fetal heart functions accompany failed spiral arterial remodeling in pregnant mice. *American Journal of Obstetrics and Gynecology* 2011;205(5):485.e1–485.e16.
68. Espinoza-Delgado I et al. Expression and role of p75 interleukin 2 receptor on human monocytes. *Journal of Experimental Medicine* 1990;171(5):1821–1826.
69. Carvalho BS, Irizarry RA. A framework for oligonucleotide microarray preprocessing. *Bioinformatics* 2010;26(19):2363–2367.
70. Ritchie ME et al. limma powers differential expression analyses for RNA-sequencing and microarray studies. *Nucleic Acids Res.* 2015;43(7):e47.
71. Huang DW, Sherman BT, Lempicki RA. Bioinformatics enrichment tools: paths toward the comprehensive functional analysis of large gene lists. *Nucleic Acids Res.* 2009;37(1):1–13.
72. Da Wei Huang, Sherman BT, Lempicki RA. Systematic and integrative analysis of large gene lists using DAVID bioinformatics resources. *Nature Protocols* 2009;4(1):44.
